# Supplementary material for: Gene Expression and Functional Studies of the Optic Nerve Head Astrocyte Transcriptome from Normal African Americans and Caucasian Americans Donors
Source: PLoS One. 2008 Aug 6;3(8):e2847. doi: 10.1371/journal.pone.0002847 (PMC2518525; doi:10.1371/journal.pone.0002847)
Supplement: Table S3 — Genes differentially expressed in normal AA ONH astrocytes compared to their CA counterpart using Lima. List of genes differentially expressed in AA ONH astrocytes compared to CA ONH astrocytes, obtained by using Limma package in Bioconductor. (0.06 MB DOC) [file pone.0002847.s003.xls]

## Sheet: Increase
Table S3A: Genes significantly increased in normal AA ONH astrocytes compared to their CA counterpart using Lima
Entrez Id	Gene Symbol	Gene Name	FC	p.value	CL	Unigene
2953	GSTT2	glutathione S-transferase theta 2	2.82	2.2e-09	22q11.2;22q11.23	Hs.1581
267	AMFR	autocrine motility factor receptor	2.79	3.75e-07	16q21	Hs.295137
5723	PSPH	phosphoserine phosphatase	2.7	9.37e-06	7p15.2-p15.1	Hs.512656
10521	DDX17	DEAD (Asp-Glu-Ala-Asp) box polypeptide 17	2.44	0.000124461	22q13.1	Hs.528305;Hs.665429
2006	ELN	elastin (supravalvular aortic stenosis, Williams-Beuren syndrome)	2.2	0.00229676	7q11.23	Hs.647061
1415	CRYBB2	crystallin, beta B2	2.18	1.808e-06	22q11.2-q12.1;22q11.23	Hs.373074
1948	EFNB2	ephrin-B2	2.05	0.0153051	13q33	Hs.149239
8490	RGS5	regulator of G-protein signalling 5	2.04	0.000612139	1q23.1	Hs.24950
4487	MSX1	msh homeobox 1	2.01	0.000403566	4p16.3-p16.1	Hs.424414;Hs.621772
8839	WISP2	WNT1 inducible signaling pathway protein 2	2	7.48e-05	20q12-q13.1	Hs.592145
64167	LRAP	leukocyte-derived arginine aminopeptidase	1.97	0.0165605	5q15	Hs.591249
9760	TOX	thymus high mobility group box protein TOX	1.92	0.0023688	8q12.1	Hs.491805;Hs.634856
6442	SGCA	sarcoglycan, alpha (50kDa dystrophin-associated glycoprotein)	1.84	4.007e-06	17q21	Hs.463412
3306	HSPA2	heat shock 70kDa protein 2	1.78	0.000507916	14q24.1	Hs.432648
5865	RAB3B	RAB3B, member RAS oncogene family	1.77	0.000320408	1p32-p31	Hs.123072
771	CA12	carbonic anhydrase XII	1.76	0.00745775	15q22	Hs.210995
1066	CES1	carboxylesterase 1 (monocyte/macrophage serine esterase 1)	1.75	0.010566	16q13-q22.1	Hs.558865
3486	IGFBP3	insulin-like growth factor binding protein 3	1.74	0.0488286	7p13-p12	Hs.450230;Hs.697535
22871	NLGN1	neuroligin 1	1.73	0.00445739	3q26.31	Hs.478289
6654	SOS1	son of sevenless homolog 1 (Drosophila)	1.67	9.06e-05	2p22-p21	Hs.278733
338645	LUZP2	leucine zipper protein 2	1.65	0.00679793	11p14.3	Hs.144138
23136	EPB41L3	erythrocyte membrane protein band 4.1-like 3	1.65	0.00192725	18p11.32	Hs.213394
678	ZFP36L2	zinc finger protein 36, C3H type-like 2	1.65	0.0227063	2p22.3-p21	Hs.503093;Hs.645068
9289	GPR56	G protein-coupled receptor 56	1.62	0.00514293	16q12.2-q21	Hs.513633
51816	CECR1	cat eye syndrome chromosome region, candidate 1	1.6	0.0458022	22q11.2	Hs.170310
8605	PLA2G4C	phospholipase A2, group IVC (cytosolic, calcium-independent)	1.6	0.0015585	19q13.3	Hs.631562
8418	CMAH	cytidine monophosphate-N-acetylneuraminic acid hydroxylase (CMP-N-acetylneuraminate monooxygenase)	1.6	0.0470663	6p21.32	Hs.484918
2678	GGT1	gamma-glutamyltransferase 1	1.57	0.00132415	22q11.23	Hs.645535
4281	MID1	midline 1 (Opitz/BBB syndrome)	1.56	0.0191577	Xp22	Hs.27695
100	ADA	adenosine deaminase	1.55	0.0297126	20q12-q13.11	Hs.255479
728441	GGT2	gamma-glutamyltransferase 2	1.54	0.00187488	22q11.21	Hs.568255;Hs.645533
388796	LOC388796	hypothetical LOC388796	1.54	0.00144252	20q11.23	Hs.400876
5698	PSMB9	proteasome (prosome, macropain) subunit, beta type, 9 (large multifunctional peptidase 2)	1.54	0.00530884	6p21.3	Hs.132682
4835	NQO2	NAD(P)H dehydrogenase, quinone 2	1.54	0.00173536	6pter-q12	Hs.533050
4660	PPP1R12B	protein phosphatase 1, regulatory (inhibitor) subunit 12B	1.53	0.00261171	1q32.1	Hs.444403
83716	CRISPLD2	cysteine-rich secretory protein LCCL domain containing 2	1.51	0.0389111	16q24.1	Hs.513779
23493	HEY2	hairy/enhancer-of-split related with YRPW motif 2	1.51	0.0117338	6q21	Hs.144287
2254	FGF9	fibroblast growth factor 9 (glia-activating factor)	1.51	0.0268201	13q11-q12	Hs.111
126393	HSPB6	heat shock protein, alpha-crystallin-related, B6	1.5	0.0193443	19q13.12	Hs.534538
80303	EFHD1	EF-hand domain family, member D1	1.49	0.0138509	2q37.1	Hs.516769
3776	KCNK2	potassium channel, subfamily K, member 2	1.49	0.0371068	1q41	Hs.497745
2674	GFRA1	GDNF family receptor alpha 1	1.49	0.00602716	10q26	Hs.591913
1984	EIF5A	eukaryotic translation initiation factor 5A	1.49	0.0182584	17p13-p12	Hs.534314
9659	PDE4DIP	phosphodiesterase 4D interacting protein (myomegalin)	1.48	0.0205336	1q12	Hs.584841;Hs.613082;Hs.654651;Hs.657490
6936	C2orf3	chromosome 2 open reading frame 3	1.48	0.00301651	2p11.2-p11.1	Hs.303808
6376	CX3CL1	chemokine (C-X3-C motif) ligand 1	1.48	0.0497988	16q13	Hs.531668
165	AEBP1	AE binding protein 1	1.48	0.0251921	7p13	Hs.439463
8863	PER3	period homolog 3 (Drosophila)	1.47	0.0277269	1p36.23	Hs.533339
4638	MYLK	myosin, light chain kinase	1.47	0.0435353	3q21	Hs.556600
64780	MICAL1	microtubule associated monoxygenase, calponin and LIM domain containing 1	1.46	0.00790326	6q21	Hs.33476
3488	IGFBP5	insulin-like growth factor binding protein 5	1.46	0.0113223	2q33-q36	Hs.635441
862	RUNX1T1	runt-related transcription factor 1; translocated to, 1 (cyclin D-related)	1.45	0.0391846	8q22	Hs.368431
92086	GGTLA4	gamma-glutamyltransferase-like activity 4	1.44	0.00906054	20p11.1	Hs.355394
4047	LSS	lanosterol synthase (2,3-oxidosqualene-lanosterol cyclase)	1.44	0.00317247	21q22.3	Hs.596543
10965	ACOT2	acyl-CoA thioesterase 2	1.43	0.00150389	14q24.3	Hs.446685
4781	NFIB	nuclear factor I/B	1.43	0.0242434	9p24.1	Hs.370359
57509	MTUS1	mitochondrial tumor suppressor 1	1.42	0.036479	8p22	Hs.7946
2948	GSTM4	glutathione S-transferase M4	1.42	0.0244623	1p13.3	Hs.348387
80781	COL18A1	collagen, type XVIII, alpha 1	1.41	0.0168633	21q22.3	Hs.517356
55089	SLC38A4	solute carrier family 38, member 4	1.41	0.0176021	12q13	Hs.446077
9638	FEZ1	fasciculation and elongation protein zeta 1 (zygin I)	1.41	0.0231943	11q24.2	Hs.224008
683	BST1	bone marrow stromal cell antigen 1	1.41	0.000719998	4p15	Hs.169998
54913	RPP25	ribonuclease P 25kDa subunit	1.4	0.00345174	15q24.1	Hs.8562
10231	DSCR1L1	Down syndrome critical region gene 1-like 1	1.39	0.0268289	6p12.3	Hs.440168
5021	OXTR	oxytocin receptor	1.38	0.0278264	3p25	Hs.2820
3600	IL15	interleukin 15	1.38	0.0344758	4q31	Hs.654378
785	CACNB4	calcium channel, voltage-dependent, beta 4 subunit	1.38	0.006385	2q22-q23	Hs.614033
7536	SF1	splicing factor 1	1.37	0.0172204	11q13	Hs.502829
3134	HLA-F	major histocompatibility complex, class I, F	1.37	0.000692391	6p21.3	Hs.519972
728215	LOC728215	similar to transmembrane protein 28	1.36	0.0155919	13q33.3	Hs.535394
84809	MGC12760	hypothetical protein MGC12760	1.36	0.010901	1p36.13	Hs.631865
116987	CENTG2	centaurin, gamma 2	1.35	0.0103404	2p24.3-p24.1	Hs.435039
4883	NPR3	natriuretic peptide receptor C/guanylate cyclase C (atrionatriuretic peptide receptor C)	1.35	0.0403787	5p14-p13	Hs.237028;Hs.619466
985	CDC2L2	cell division cycle 2-like 2 (PITSLRE proteins)	1.35	0.0208391	1p36.33	Hs.651228
85360	SYDE1	synapse defective 1, Rho GTPase, homolog 1 (C. elegans)	1.34	0.0011513	19p13.12	Hs.528701
5696	PSMB8	proteasome (prosome, macropain) subunit, beta type, 8 (large multifunctional peptidase 7)	1.34	0.00403762	6p21.3	Hs.180062
3106	HLA-B	major histocompatibility complex, class I, B	1.34	0.00871416	6p21.3	Hs.77961
249	ALPL	alkaline phosphatase, liver/bone/kidney	1.34	0.0222713	1p36.1-p34	Hs.75431
25802	LMOD1	leiomodin 1 (smooth muscle)	1.33	0.0247088	1q32	Hs.519075
11147	HHLA3	HERV-H LTR-associating 3	1.33	0.038355	1p31.1	Hs.142245
11103	KRR1	KRR1, small subunit (SSU) processome component, homolog (yeast)	1.33	0.0303579	12q21.2	Hs.645517
6509	SLC1A4	solute carrier family 1 (glutamate/neutral amino acid transporter), member 4	1.33	0.0104632	2p15-p13	Hs.323878
5747	PTK2	PTK2 protein tyrosine kinase 2	1.33	0.0392651	8q24-qter	Hs.395482
10404	PGCP	plasma glutamate carboxypeptidase	1.32	0.00288707	8q22.2	Hs.156178
5763	PTMS	parathymosin	1.32	0.0138545	12p13	Hs.504613
1429	CRYZ	crystallin, zeta (quinone reductase)	1.32	0.0457725	1p31-p22	Hs.83114
11010	GLIPR1	GLI pathogenesis-related 1 (glioma)	1.31	0.0318731	12q21.2	Hs.205558
8814	CDKL1	cyclin-dependent kinase-like 1 (CDC2-related kinase)	1.31	0.0105304	14q22.1	Hs.280881
5190	PEX6	peroxisomal biogenesis factor 6	1.31	0.0305703	6p21.1	Hs.656425
2947	GSTM3	glutathione S-transferase M3 (brain)	1.31	0.0145307	1p13.3	Hs.2006
29092	HSPC157	HSPC157 protein	1.3	0.00465777	1p36.12	Hs.279842
2946	GSTM2	glutathione S-transferase M2 (muscle)	1.3	0.00208933	1p13.3	Hs.279837
1059	CENPB	centromere protein B, 80kDa	1.3	0.0490261	20p13	Hs.516855
109	ADCY3	adenylate cyclase 3	1.3	0.03003	2p23.3	Hs.467898

## Sheet: Decrease
Table S3B: Genes significantly decreased in normal AA ONH astrocytes compared to their CA counterpart using Lima
Entrez Id	Gene Symbol	Gene Name	FC	p.value	CL	Unigene
84168	ANTXR1	anthrax toxin receptor 1	-2.3	2.66e-07	2p13.1	Hs.165859
54674	LRRN3	leucine rich repeat neuronal 3	-2.27	0.00394196	7q31.1	Hs.3781
7292	TNFSF4	tumor necrosis factor (ligand) superfamily, member 4 (tax-transcriptionally activated glycoprotein 1, 34kDa)	-2.19	0.00366252	1q25	Hs.181097
894	CCND2	cyclin D2	-2.11	0.0215305	12p13	Hs.376071
205	AK3L1	adenylate kinase 3-like 1	-2.08	0.00736419	1p31.3	Hs.10862;Hs.592601
7010	TEK	TEK tyrosine kinase, endothelial (venous malformations, multiple cutaneous and mucosal)	-2.08	0.000584699	9p21	Hs.89640
57419	SLC24A3	solute carrier family 24 (sodium/potassium/calcium exchanger), member 3	-1.98	0.0180041	20p13	Hs.654790
5744	PTHLH	parathyroid hormone-like hormone	-1.98	0.0117913	12p12.1-p11.2	Hs.591159
10234	LRRC17	leucine rich repeat containing 17	-1.93	0.00548889	7q22.1	Hs.567412
7345	UCHL1	ubiquitin carboxyl-terminal esterase L1 (ubiquitin thiolesterase)	-1.91	1.98e-05	4p14	Hs.518731
56271	BEXL1	brain expressed X-linked-like 1	-1.9	0.0191868	Xq22.1-q22.3	Hs.184736
6431	SFRS6	splicing factor, arginine/serine-rich 6	-1.87	0.0029456	20q12-q13.1	Hs.6891
5743	PTGS2	prostaglandin-endoperoxide synthase 2 (prostaglandin G/H synthase and cyclooxygenase)	-1.84	0.0255009	1q25.2-q25.3	Hs.196384
645619	LOC645619	similar to Adenylate kinase isoenzyme 4, mitochondrial (ATP-AMP transphosphorylase)	-1.81	0.00548517	12p11.21	Hs.505172
6664	SOX11	SRY (sex determining region Y)-box 11	-1.8	0.000176748	2p25	Hs.432638
1829	DSG2	desmoglein 2	-1.79	0.0156044	18q12.1	Hs.412597
3875	KRT18	keratin 18	-1.77	0.0138577	12q13	Hs.406013
6000	RGS7	regulator of G-protein signalling 7	-1.73	0.0217471	1q43;1q23.1	Hs.655739
6769	STAC	SH3 and cysteine rich domain	-1.71	0.00672206	3p22.3	Hs.56045
6364	CCL20	chemokine (C-C motif) ligand 20	-1.69	0.0105733	2q33-q37	Hs.75498
91752	ZNF804A	zinc finger protein 804A	-1.68	0.0410439	2q32.1	Hs.159528
51778	MYOZ2	myozenin 2	-1.67	0.039408	4q26-q27	Hs.381047
81557	MAGED4	melanoma antigen family D, 4	-1.67	0.00286823	NA	Hs.571729
2044	EPHA5	EPH receptor A5	-1.65	0.0424172	4q13.1	Hs.654492
3655	ITGA6	integrin, alpha 6	-1.64	0.00547056	2q31.1	Hs.133397
11082	ESM1	endothelial cell-specific molecule 1	-1.63	0.0197598	5q11.2	Hs.129944
5352	PLOD2	procollagen-lysine, 2-oxoglutarate 5-dioxygenase 2	-1.6	0.00544924	3q23-q24	Hs.477866
1305	COL13A1	collagen, type XIII, alpha 1	-1.59	0.0117167	10q22	Hs.695934
2878	GPX3	glutathione peroxidase 3 (plasma)	-1.58	0.0135437	5q23	Hs.386793;Hs.663430
3569	IL6	interleukin 6 (interferon, beta 2)	-1.57	0.00609951	7p21	Hs.654458
1839	HBEGF	heparin-binding EGF-like growth factor	-1.57	0.0043801	5q23	Hs.799
80323	CCDC68	coiled-coil domain containing 68	-1.56	0.0120095	18q21	Hs.120790
60559	SPCS3	signal peptidase complex subunit 3 homolog (S. cerevisiae)	-1.55	0.000348943	4q34.2	Hs.42194
3728	JUP	junction plakoglobin	-1.55	0.00243675	17q21	Hs.514174
183	AGT	angiotensinogen (serpin peptidase inhibitor, clade A, member 8)	-1.54	0.015958	1q42-q43	Hs.19383
29091	STXBP6	syntaxin binding protein 6 (amisyn)	-1.53	0.00158579	14q12	Hs.508958
3976	LIF	leukemia inhibitory factor (cholinergic differentiation factor)	-1.53	0.0150113	22q12.2	Hs.2250
23587	C17orf81	chromosome 17 open reading frame 81	-1.52	0.000282394	17p13.1	Hs.417029
56254	RNF20	ring finger protein 20	-1.51	0.00755674	9q22	Hs.656088
4081	MAB21L1	mab-21-like 1 (C. elegans)	-1.51	0.0333649	13q13	Hs.584776
4237	MFAP2	microfibrillar-associated protein 2	-1.51	0.00156531	1p36.1-p35	Hs.389137
2331	FMOD	fibromodulin	-1.51	0.0221656	1q32	Hs.519168
23231	KIAA0746	KIAA0746 protein	-1.5	0.00178562	4p15.2	Hs.479384
6781	STC1	stanniocalcin 1	-1.5	0.0260093	8p21-p11.2	Hs.25590
8869	ST3GAL5	ST3 beta-galactoside alpha-2,3-sialyltransferase 5	-1.5	0.000483739	2p11.2	Hs.415117
58494	JAM2	junctional adhesion molecule 2	-1.49	0.0322969	21q21.2	Hs.517227
9630	GNA14	guanine nucleotide binding protein (G protein), alpha 14	-1.49	0.0207878	9q21	Hs.657795
2581	GALC	galactosylceramidase	-1.48	0.0279645	14q31	Hs.513439
284	ANGPT1	angiopoietin 1	-1.48	0.0474509	8q22.3-q23	Hs.369675
27075	TSPAN13	tetraspanin 13	-1.48	0.0388209	7p21.1	Hs.364544
2317	FLNB	filamin B, beta (actin binding protein 278)	-1.46	0.00265546	3p14.3	Hs.476448
7052	TGM2	transglutaminase 2 (C polypeptide, protein-glutamine-gamma-glutamyltransferase)	-1.46	0.0456447	20q12	Hs.517033
58516	FAM60A	family with sequence similarity 60, member A	-1.46	0.0104943	12p11	Hs.505154
7351	UCP2	uncoupling protein 2 (mitochondrial, proton carrier)	-1.45	0.016124	11q13	Hs.80658
8324	FZD7	frizzled homolog 7 (Drosophila)	-1.45	0.00407627	2q33	Hs.173859
51200	CPA4	carboxypeptidase A4	-1.45	0.0425496	7q32	Hs.93764
57194	ATP10A	ATPase, Class V, type 10A	-1.44	0.00352742	15q11.2	Hs.128041
55256	ADI1	acireductone dioxygenase 1	-1.43	0.00122811	2p25.3	Hs.502773
3113	HLA-DPA1	major histocompatibility complex, class II, DP alpha 1	-1.42	0.00679074	6p21.3	Hs.347270
1620	DBC1	deleted in bladder cancer 1	-1.41	0.0474688	9q32-q33	Hs.532316
22795	NID2	nidogen 2 (osteonidogen)	-1.41	0.000139415	14q21-q22	Hs.369840
9734	HDAC9	histone deacetylase 9	-1.41	0.0357916	7p21.1	Hs.196054
8837	CFLAR	CASP8 and FADD-like apoptosis regulator	-1.41	9.09e-05	2q33-q34	Hs.390736
400322	HERC2P2	hect domain and RLD 2 pseudogene 2	-1.41	0.00372256	15q11.2	Hs.458334
56925	LXN	latexin	-1.41	0.018943	3q25.32	Hs.478067
1288	COL4A6	collagen, type IV, alpha 6	-1.41	0.0272563	Xq22	Hs.145586
5935	RBM3	RNA binding motif (RNP1, RRM) protein 3	-1.4	0.00794456	Xp11.2	Hs.301404
2745	GLRX	glutaredoxin (thioltransferase)	-1.4	0.00291625	5q14	Hs.28988
25891	DKFZP586H2123	regeneration associated muscle protease	-1.39	0.0319462	11p13	Hs.55044
8553	BHLHB2	basic helix-loop-helix domain containing, class B, 2	-1.39	0.00476231	3p26	Hs.171825
9497	SLC4A7	solute carrier family 4, sodium bicarbonate cotransporter, member 7	-1.39	0.0114498	3p22	Hs.250072
3856	KRT8	keratin 8	-1.38	0.00539466	12q13	Hs.533782;Hs.676772
10252	SPRY1	sprouty homolog 1, antagonist of FGF signaling (Drosophila)	-1.38	0.0104997	4q28.1	Hs.436944
4217	MAP3K5	mitogen-activated protein kinase kinase kinase 5	-1.36	0.0214203	6q22.33	Hs.186486
23475	QPRT	quinolinate phosphoribosyltransferase (nicotinate-nucleotide pyrophosphorylase (carboxylating))	-1.36	0.0250033	16p11.2	Hs.513484
55630	SLC39A4	solute carrier family 39 (zinc transporter), member 4	-1.35	0.00567829	8q24.3	Hs.521934
8793	TNFRSF10D	tumor necrosis factor receptor superfamily, member 10d, decoy with truncated death domain	-1.35	0.0391202	8p21	Hs.213467
11199	ANXA10	annexin A10	-1.34	0.0394849	4q33	Hs.188401
90333	ZNF468	zinc finger protein 468	-1.34	0.040003	19q13.41	Hs.467223
50863	HNT	neurotrimin	-1.34	0.0368032	11q25	Hs.504352
57761	TRIB3	tribbles homolog 3 (Drosophila)	-1.34	0.0113551	20p13-p12.2	Hs.516826
9508	ADAMTS3	ADAM metallopeptidase with thrombospondin type 1 motif, 3	-1.33	0.0497236	4q13.3	Hs.590919
9050	PSTPIP2	proline-serine-threonine phosphatase interacting protein 2	-1.32	0.0173798	18q12	Hs.567384
5774	PTPN3	protein tyrosine phosphatase, non-receptor type 3	-1.32	0.0132334	9q31	Hs.436429
51400	PPME1	protein phosphatase methylesterase 1	-1.32	0.0265715	11q13.4	Hs.503251
2321	FLT1	fms-related tyrosine kinase 1 (vascular endothelial growth factor/vascular permeability factor receptor)	-1.32	0.0116556	13q12	Hs.507621
5329	PLAUR	plasminogen activator, urokinase receptor	-1.32	0.0314499	19q13	Hs.466871
1075	CTSC	cathepsin C	-1.31	0.0488059	11q14.1-q14.3	Hs.128065
4861	NPAS1	neuronal PAS domain protein 1	-1.31	0.0374808	19q13.2-q13.3	Hs.79564
157	ADRBK2	adrenergic, beta, receptor kinase 2	-1.31	0.000828486	22q11;22q12.1	Hs.657494
2050	EPHB4	EPH receptor B4	-1.3	0.00449557	7q22	Hs.437008
1984	EIF5A	eukaryotic translation initiation factor 5A	-1.3	0.0139894	17p13-p12	Hs.534314
1969	EPHA2	EPH receptor A2	-1.3	0.0192675	1p36	Hs.171596
5997	RGS2	regulator of G-protein signalling 2, 24kDa	-1.3	0.0139641	1q31	Hs.78944
