# Supplementary material for: Gene Expression and Functional Studies of the Optic Nerve Head Astrocyte Transcriptome from Normal African Americans and Caucasian Americans Donors
Source: PLoS One. 2008 Aug 6;3(8):e2847. doi: 10.1371/journal.pone.0002847 (PMC2518525; doi:10.1371/journal.pone.0002847)
Supplement: Table S4 — Functional analysis of genes differentially expressed in AA vs. CA. Functional classification of genes differentially expressed in AA ONH astrocytes compared to and CA ONH astrocytes. (0.06 MB DOC) [file pone.0002847.s004.xls]

## Sheet: Increased AA vs. CA
Table S4A: Functional analysis of genes significantly increased in AA vs. CA
Entrez Gene	Gene Symbol	Representative ID	Gene Title	FC	P-value	CL	UniGene ID
			Signal Tranduction
8781	PSPH	NM_004577	phosphoserine phosphatase	2.69558	9.36731e-06	7q11.2	Hs.536913
9659	PDE4DIP	AB042557	phosphodiesterase 4D interacting protein	2.49929	5.36572e-06	1q12	Hs.584841
8490	RGS5	NM_003617	regulator of G-protein signalling 5	2.3471	0.000688351	1q23.1	Hs.24950
6654	SOS1	L13857	son of sevenless homolog 1	1.66995	9.05912e-05	2p22-p21	Hs.654397
5865	RAB3B	NM_002867	Member RAS oncogene family	1.63848	0.000553445	1p32-p31	Hs.123072
9289	GPR56	NM_005682	G protein-coupled receptor 56	1.61536	0.00514293	16q12.2-q21	Hs.513633
8605	PLA2G4C	NM_003706	phospholipase A2, group IVC	1.60496	0.0015585	19q13.3	Hs.631562
4660	PPP1R12B	AF324888	protein phosphatase 1, regulatory (inhibitor) subunit 12B	1.53402	0.0026117	1q32.1	Hs.444403
4638	MYLK	NM_005965	myosin, light polypeptide kinase	1.47201	0.0435353	3q21	Hs.556600
116987	CENTG2	NM_014914	centaurin, gamma 2	1.35044	0.0103404	2p24.3-p24.1	Hs.435039
4883	NPR3	NM_000908	natriuretic peptide receptor C	1.3451	0.0403787	5p14-p13	Hs.619466
85360	SYDE1	AK023573	synapse defective 1, Rho GTPase, homolog 1	1.33549	0.0011513	19p13.12	Hs.528701
5747	PTK2	AL037339	protein tyrosine kinase 2	1.33469	0.0392651	8q24-qter	Hs.395482
109	ADCY3	AF033861	adenylate cyclase 3	1.2965	0.03003	2p23.3	Hs.467898
115	ADCY9	AF036927	adenylate cyclase 9	1.21	0.0215517	16p13.3	Hs.391860;Hs.610484
			Cellular detoxification/oxidative stress
2953	GSTT2	NM_000854	glutathione S-transferase theta 2	2.81696	2.24861e-09	22q11.2; 22q11.23	Hs.654462
91227	GGT1	L20493	gamma-glutamyltransferase 1	1.62334	0.000428703	22q11.22	Hs.450000
645367	GGT2	AI344075	gamma-glutamyltransferase 2	1.53691	0.00187488	22q11.1	Hs.650223
92086	GGTLA4	L20492	gamma-glutamyltransferase-like activity 4	1.44326	0.00906054	20p11.1	Hs.355394
2948	GSTM4	NM_000850	glutathione S-transferase M4	1.42257	0.0244623	1p13.3	Hs.348387
2944	GSTM1	NM_000561	glutathione S-transferase M1	1.37583	0.000991576	1p13.3	Hs.301961
2947	GSTM3	AL527430	glutathione S-transferase M3	1.3136	0.0145307	1p13.3	Hs.2006
2946	GSTM2	NM_000848	glutathione S-transferase M2	1.30232	0.00208933	1p13.3	Hs.279837
			Growth factors and receptors
3486	IGFBP3	BF340228	insulin-like growth factor binding protein 3	1.73718	0.0488286	7p13-p12	Hs.450230
2254	FGF9	NM_002010	fibroblast growth factor 9 (glia-activating factor)	1.51069	0.0268201	13q11-q12	Hs.111
2674	GFRA1	NM_005264	GDNF family receptor alpha 1	1.49036	0.00602716	10q26	Hs.591913
6376	CX3CL1	U84487	chemokine (C-X3-C motif) ligand 1	1.47857	0.0497988	16q13	Hs.531668
3488	IGFBP5	R73554	insulin-like growth factor binding protein 5	1.46267	0.0113223	2q33-q36	Hs.635441
			RNA binding and processing
10521	DDX17	U59321	DEAD (Asp-Glu-Ala-Asp) box polypeptide 17	2.4392	0.000124461	22q13.1	Hs.528305
26777	SNORA71A	AA827892	U71A small nucleolar RNA	1.54464	0.00144252	20q11.23	Hs.681779
1984	EIF5A	AA393940	Eukaryotic translation initiation factor 5A	1.48546	0.0182584	17p13-p12	Hs.534314
54913	RPP25	NM_017793	ribonuclease P 25kDa subunit	1.40305	0.00345174	15q24.1	Hs.8562
7536	SF1	D26121	splicing factor 1	1.36789	0.0172204	11q13	Hs.502829
			Transcription factor activity
4487	MSX1	NM_002448	msh homeo box homolog 1 (Drosophila)	2.01029	0.000403566	4p16.3-p16.1	Hs.424414
678	ZFP36L2	AI356398	zinc finger protein 36, C3H type-like 2	1.72014	0.00691957	2p22.3-p21	Hs.503093
338645	LUZP2	X81895	leucine zipper protein 2	1.65324	0.00679793	11p14.3	Hs.144138
4781	NFIB	U70862	nuclear factor I/B	1.53745	0.026532	9p24.1	Hs.699215
23493	HEY2	NM_012259	hairy/enhancer-of-split	1.50925	0.0117338	6q21	Hs.144287
6936	C2orf3	AC005034	chromosome 2 open reading frame 3	1.48479	0.00301651	2p11.2-p11.1	Hs.44024
165	AEBP1	NM_001129	AE binding protein 1	1.47827	0.0251921	7p13	Hs.439463
862	RUNX1T1	X79990	runt-related transcription factor 1	1.45287	0.0391846	8q22	Hs.368431
			Cell Adhesion
8839	WISP2	NM_003881	WNT1 inducible signaling pathway protein 2	1.99678	7.47755e-05	20q12-q13.1	Hs.592145
1948	EFNB2	U16797	ephrin-B2	1.95405	0.00378481	13q33	Hs.149239
22871	NLGN1	NM_014932	neuroligin 1	1.73132	0.00445739	3q26.31	Hs.478289
23136	EPB41L3	NM_012307	erythrocyte membrane protein band 4.1-like 3	1.65842	0.00198619	18p11.32	Hs.213394
			Cytoskeleton, chaperones
1415	CRYBB2	NM_000496	crystallin, beta B2	2.18259	1.80803e-06	22q11.2-q12.1; 22q11.23	Hs.373074
6442	SGCA	L35853	sarcoglycan, alpha (50kDa dystrophin-associated glycoprotein)	1.84038	4.00699e-06	17q21	Hs.463412
3306	HSPA2	U56725	heat shock 70kDa protein 2	1.77569	0.000507916	14q24.1	Hs.432648
126393	HSPB6	AL551046	heat shock protein, alpha-crystallin-related, B6	1.5024	0.0193443	19q13.12	Hs.534538
4638	MYLK	NM_005965	myosin, light polypeptide kinase	1.47201	0.0435353	3q21	Hs.556600
64780	MICAL1	NM_022765	microtubule associated monoxygenase, calponin and LIM domain containing 1	1.46334	0.00790326	6q21	Hs.33476
9638	FEZ1	NM_005103	fasciculation and elongation protein zeta 1 (zygin I)	1.40931	0.0231943	11q24.2	Hs.224008
			Immune response
64167	LRAP	NM_022350	leukocyte-derived arginine aminopeptidase	1.97206	0.0165605	5q15	Hs.591249
9760	TOX	AI961231	thymus high mobility group box protein TOX	1.92283	0.0023688	8q12.1	Hs.491805
5698	PSMB9	NM_002800	proteasome (prosome, macropain) subunit, beta type, 9	1.54335	0.00530884	6p21.3	Hs.654585
683	BST1	NM_004334	bone marrow stromal cell antigen 1	1.40944	0.000719998	4p15	Hs.169998
3600	IL15	NM_000585	interleukin 15	1.37625	0.0344758	4q31	Hs.654378
3106	HLA-B	D83043	major histocompatibility complex, class I, B	1.33873	0.00871416	6p21.3	Hs.77961
3134	HLA-F	NM_018950	major histocompatibility complex, class I, F	1.3379	0.00189928	6p21.3	Hs.519972
			Mitochondrial proteins
4835	NQO2	NM_000904	NAD(P)H dehydrogenase, quinone 2	1.53517	0.00173536	6pter-q12	Hs.533050
641371	ACOT2	NM_006821	acyl-CoA thioesterase 2	1.42649	0.00150389	14q24.3	Hs.700643
57509	MTUS1	AL096842	mitochondrial tumor suppressor 1	1.41858	0.036479	8p22	Hs.7946
			ECM and related protein
2006	ELN	AA479278	elastin	2.20231	0.00229676	7q11.23	Hs.647061
80781	COL18A1	AF018081	collagen type XVIII, alpha 1	1.41	0.0169	21q22.3	Hs. 84190
4052	LTBP1	NM_206943	latent transforming growth factor beta binding protein 1	1.539	0.0239	2p22-p21	Hs.654497
			One-Carbon metabolism
771	CA12	NM_001218	carbonic anhydrase XII	1.7561	0.00745775	15q22	Hs.210995
			Transport/carrier
3776	KCNK2	AF004711	potassium channel, subfamily K, member 2	1.4908	0.0371068	1q41	Hs.497745
80303	EFHD1	BC002449	EF-hand domain family, member D1	1.49049	0.0138509	2q37.1	Hs.516769
55089	SLC38A4	NM_018018	solute carrier family 38, member 4	1.4118	0.0176021	12q13	Hs.446077
785	CACNB4	NM_000726	calcium channel, voltage-dependent, beta 4 subunit	1.37756	0.006385	2q22-q23	Hs.614033
6509	SLC1A4	BF340083	solute carrier family 1 (glutamate/neutral amino acid transporter), member 4	1.32806	0.0104632	2p15-p13	Hs.654352
			Cell motility
267	AMFR	NM_001144	autocrine motility factor receptor	2.7916	3.753e-07	16q21	Hs.295137
			Protein degradation
4281	MID1	NM_000381	midline 1 (ubiquitin ligase )	1.6475	0.0384891	Xp22	Hs.27695
5698	PSMB9	NM_002800	proteasome (prosome, macropain) subunit, beta type 9	1.54335	0.00530884	6p21.3	Hs.654585
1066	CES1	S73751	carboxylesterase 1	1.74975	0.010566	16q13-q22.1	Hs.558865
			Others
83716	CRISPLD2	AL136861	cysteine-rich secretory protein LCCL domain containing 2	1.51141	0.0389111	16q24.1	Hs.513779
100	ADA	X02189	adenosine deaminase	1.54681	0.0297126	20q12-q13.11	Hs.654536
FC: fold change; CL: chromosome location.

## Sheet: Decreased AA vs. CA
Table S4B: Functional analysis of genes significantly decreased in AA vs. CA
Entrez Gene	Gene Symbol	Representative ID	Gene Title	FC	P-value	CL	UniGene ID
			CNS related
54674	LRRN3	AI221950	leucine rich repeat neuronal 3	-2.2657	0.00394196	7q31.1	Hs.3781
10234	LRRC17	NM_005824	leucine rich repeat containing 17	-1.93143	0.00548889	7q22.1	Hs.567412
29091	STXBP6	NM_014178	syntaxin binding protein 6	-1.52942	0.00158579	14q12	Hs.508958
7345	UCHL1	NM_004181	ubiquitin carboxyl-terminal esterase L1	-1.90728	1.98219e-05	4p14	Hs.518731
6769	STAC	NM_003149	SH3 and cysteine rich domain	-1.70513	0.00672206	3p22.3	Hs.56045
728239	MAGED4	NM_030801	melanoma antigen family D, 4	-1.66955	0.00286823	Xp11	Hs.522650
8869	ST3GAL5	NM_003896	ST3 beta-galactoside alpha-2,3-sialyltransferase 5	-1.49563	0.000483739	2p11.2	Hs.415117
4862	NPAS2	AW000928	neuronal PAS domain protein 2	-1.4017	0.00521481	2q11.2	Hs.156832
			ECM and related protein
4237	MFAP2	NM_017459	microfibrillar-associated protein 2	-1.5096	0.00156531	1p36.1-p35	Hs.389137
55256	MTCBP-1	NM_018269	membrane-type 1 matrix metalloproteinase cytoplasmic tail binding protein-1	-1.42521	0.00122811	2p25.2	Hs.502773
22795	NID2	NM_007361	nidogen 2	-1.41295	0.000139415	14q21-q22	Hs.369840
5352	PLOD2	AI754404	procollagen-lysine, 2-oxoglutarate 5-dioxygenase 2	-1.59898	0.00544924	3q23-q24	Hs.477866
			Signalling
7010	TEK	NM_000459	TEK tyrosine kinase	-2.0802	0.000584699	9p21	Hs.89640
205	AK3L1 (AK3)	AI653169	adenylate kinase 3-like 1	-1.80996	0.00548517	1p31.3	Hs.10862
6769	STAC	NM_003149	SH3 and cysteine rich domain	-1.70513	0.00672206	3p22.3	Hs.56045
8324	FZD7	NM_003507	frizzled homolog 7	-1.45418	0.00407627	2q33	Hs.173859
157	ADRBK2	AA536000	adrenergic, beta, receptor kinase 2	-1.30505	0.000828486	22q12.1	Hs.657494
			Growth factor
7422	VEGF	AF022375	vascular endothelial growth factor	-1.48447	0.00505592	6p12	Hs.73793
1839	HBEGF	M60278	heparin-binding EGF-like growth factor	-1.56625	0.0043801	5q23	Hs.799
			Transcription factor activity
6664	SOX11	AW157202	SRY (sex determining region Y)-box 11	-1.80145	0.000176748	2p25	Hs.432638
			RNA Processing
6431	SFRS6	NM_006275	splicing factor, arginine/serine-rich 6	-1.87355	0.0029456	20q12-q13.1	Hs.6891
			Ion Transport
2745	GLRX	AF162769	glutaredoxin (thioltransferase)	-1.39725	0.00291625	5q14	Hs.28988
55630	SLC39A4	NM_017767	solute carrier family 39, member 4	-1.34924	0.00567829	8q24.3	Hs.521934
			Cell adhesion
3655	ITGA6	AV733308	integrin, alpha 6	-1.63948	0.00547056	2q31.1	Hs.133397
3728	JUP	NM_021991	junction plakoglobin	1.55001	0.00243675	17q21	Hs.514174
8869	ST3GAL5	NM_003896	ST3 beta-galactoside alpha-2,3-sialyltransferase 5	-1.49563	0.000483739	2p11.2	Hs.415117
84168	ANTXR1	NM_018153	anthrax toxin receptor 1	-2.30031	2.66333e-07	2p13.1	Hs.165859
			Endocytic pathway
84168	ANTXR1	NM_018153	anthrax toxin receptor 1	-2.30031	2.66333e-07	2p13.1	Hs.165859
79890	RIN3	AA625133	Ras and Rab interactor 3	-1.29388	0.00614811	14q32.12	Hs.326822
29091	STXBP6	NM_014178	syntaxin binding protein 6	-1.52942	0.00158579	14q12	Hs.508958
			Protein synthesis
60559	SPCS3	NM_021928	signal peptidase complex subunit 3 homolog	-1.55111	0.000348943	4q34.2	Hs.42194
			Protein degradation
7345	UCHL1	NM_004181	ubiquitin carboxyl-terminal esterase L1	-1.90728	1.98219e-05	4p14	Hs.518731
			Cytoskeleton
2317	FLNB	M62994	filamin B, beta	-1.45774	0.00265546	3p14.3	Hs.476448
			Neuronal markers
54674	LRRN3	AI221950	leucine rich repeat neuronal 3	-2.2657	0.00394196	7q31.1	Hs.3781
10234	LRRC17	NM_005824	leucine rich repeat containing 17	-1.93143	0.00548889	7q22.1	Hs.567412
4862	NPAS2	AW000928	neuronal PAS domain protein 2	-1.4017	0.00521481	2q11.2	Hs.156832
205	AK3L1	AI653169	adenylate kinase 3-like 1	-1.80996	0.00548517	1p31.3	Hs.10862
57194	ATP10A	N35112	ATPase, Class V, type 10A	-1.43766	0.00352743	15q11.2	Hs.659258
			Cytokines
7292	TNFSF4	NM_003326	tumor necrosis factor (ligand) superfamily, member 4	-2.19482	0.00366252	1q25	Hs.181097
3569	IL6	NM_000600	interleukin 6	-1.57341	0.00609951	7p21	Hs.654458
			Ion Transport
2745	GLRX	AF162769	glutaredoxin	-1.39725	0.00291625	5q14	Hs.28988
55630	SLC39A4	NM_017767	solute carrier family 39, member 4	-1.34924	0.00567829	8q24.3	Hs.521934
			Others
56254	RNF20	AV726900	Ring finger protein 20	-1.51394	0.00755674	9q31.1	Hs.656088
23231	KIAA0746	AB018289	KIAA0746 protein	-1.50411	0.00178562	4p15.2	Hs.479384
400322	HERC2P2	AB002391	hect domain and RLD 2 pseudogene 2	-1.40825	0.00372256	15q11.2	Hs.458334
3113	HLA-DPA1	M27487	major histocompatibility complex, class II, DP alpha 1	-1.4209	0.00679074	6p21.3	Hs.347270
8837	CFLAR	AF005775	CASP8 and FADD-like apoptosis regulator	-1.40826	9.08841e-05	2q33-q34	Hs.390736
FC: fold change; CL: chromosome location.
